# Supplementary material for: CsPbBr3:xEu3+ perovskite QD borosilicate glass: a new member of the luminescent material family
Source: Royal Society of Chemistry journal article supplement (doi:10.1039/c8cc00243f), 2018-01-01
Supplement: c8cc00243f1.pdf [file c8cc00243f1.pdf]

## Supporting Information

**CsPbBr<sub>3</sub>: xEu<sup>3+</sup>perovskiteQDs borosilicate glass: a new member to the family of luminescent materials.**

Rongrong Yuan, Lingli Shen, Chenyang Shen, Jianming Liu, Lei Zhou, Weidong Xiang\* and

Xiaojuan Liang\*

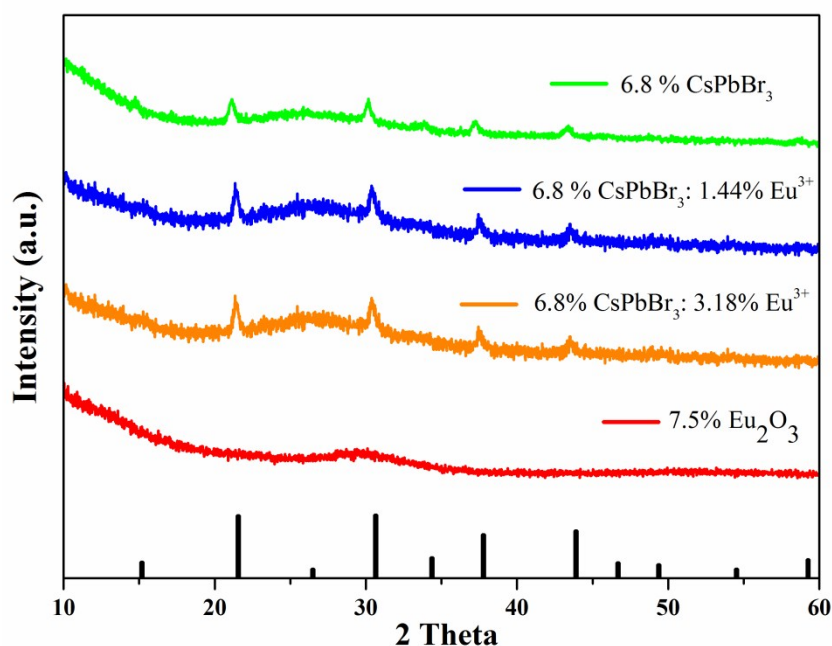

Figure S1. XRD pattern of  $\text{CsPbBr}_3:x \text{Eu}^{3+}$  glass sample. The diffraction peaks of the  $\text{CsPbBr}_3:x \text{Eu}^{3+}$  QDs glasses with 2-theta value located in approximately  $21.86^\circ$ ,  $30.81^\circ$ ,  $37.92^\circ$ ,  $44.11^\circ$ , which are corresponding to the (110), (200), (211), (220) planes of cubic phase of  $\text{CsPbBr}_3$  (JCPDS No. 54-0752).

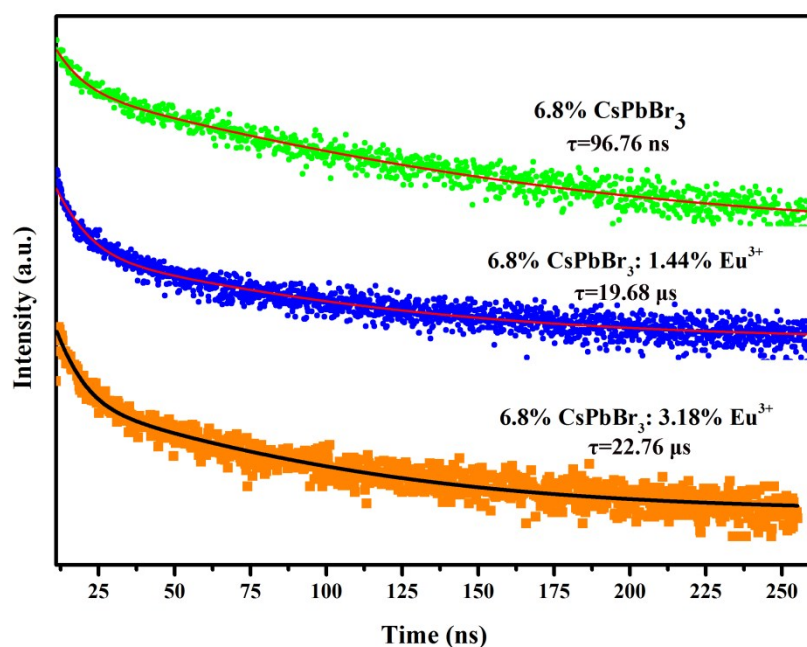

Figure S2. PL decay curves of the perovskite  $\text{CsPbBr}_3:x \text{Eu}^{3+}$  QDs glasses with different  $\text{Eu}^{3+}$  ions concentrations measured using 365 nm excitation.

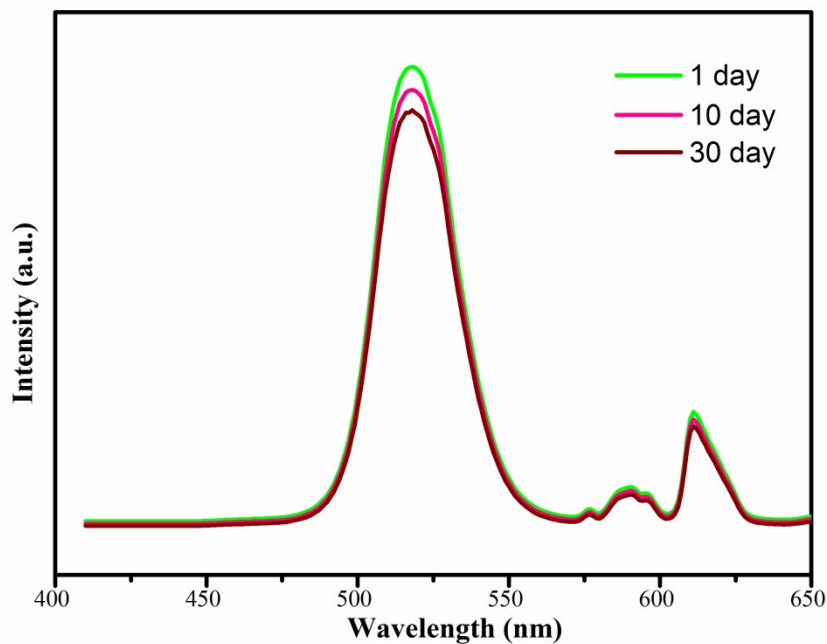

Fig S3. PL spectra of 6.8%CsPbBr<sub>3</sub>:1.44%Eu<sup>3+</sup> QDsglass after different time.

Table S1 Absolute PLQY of overall region for CsPbBr<sub>3</sub> QDs with different concentrations

| sample                  | PLQY  |
|-------------------------|-------|
| 1.7%CsPbBr <sub>3</sub> | 84.5% |
| 3.4%CsPbBr <sub>3</sub> | 41.9% |
| 6.8%CsPbBr <sub>3</sub> | 35.2% |
| 9.5%CsPbBr <sub>3</sub> | 20%   |

Table S2.The theoretical and actual concentrations of Pb<sup>2+</sup> and Eu<sup>3+</sup> ions when CsPbBr<sub>3</sub>:xEu<sup>3+</sup> glasses dissolved in a liter of revant.

| Samples                                        | Theoretical concentrations |                   | Actual concentrations |                   |
|------------------------------------------------|----------------------------|-------------------|-----------------------|-------------------|
|                                                | C <sub>Pb2+</sub>          | C <sub>Eu3+</sub> | C <sub>Pb2+</sub>     | C <sub>Eu3+</sub> |
| 6.8%CsPbBr <sub>3</sub> :1.44%Eu <sup>3+</sup> | 0.177 g/L                  | 0.072 g/L         | 0.163 g/L             | 0.067 g/L         |
| 6.8%CsPbBr <sub>3</sub> :3.18%Eu <sup>3+</sup> | 0.503 g/L                  | 0.156 g/L         | 0.451 g/L             | 0.134 g/L         |

ICP was used to measure the actual doping concentrations of  $\text{Eu}^{3+}$  in the solid  $\text{CsPbBr}_3$  crystals by measuring the PL the concentration of  $\text{Eu}^{3+}$  left in the filtrate, 20mg glass powder were dissolved in 20ml HF then deionized water were added in volumetric flask to dilute solution(diluted in 1000 times). The theoretical and actual concentrations of  $\text{Pb}^{2+}$  and  $\text{Eu}^{3+}$  ions were list in Table S2. By simple calculation, the theoretical concentrations of  $\text{Pb}^{2+}$  and  $\text{Eu}^{3+}$  of 6.8% $\text{CsPbBr}_3$ :1.44% $\text{Eu}^{3+}$  glass are 0.177 g/L and 0.072 g/L, the actual concentrations of  $\text{Pb}^{2+}$  and  $\text{Eu}^{3+}$  of 6.8% $\text{CsPbBr}_3$ :1.44% $\text{Eu}^{3+}$  glass are 0.163 g/L and 0.067 g/L; The theoretical concentrations of  $\text{Pb}^{2+}$  and  $\text{Eu}^{3+}$  of 6.8% $\text{CsPbBr}_3$ :3.18% $\text{Eu}^{3+}$  glass are 0.503g/L and 0.156 g/L, the actual concentrations of  $\text{Pb}^{2+}$  and  $\text{Eu}^{3+}$  of 6.8% $\text{CsPbBr}_3$ :1.44% $\text{Eu}^{3+}$  glass are 0.451 g/L and 0.134 g/L. There is little difference between the theoretical concentrations and the actual concentrations, mainly due to a small amount of substances volatilized in high temperature and some unavold inaccuracy thoughtout the whole process, such as weighting and transferring operations.

Table S3. Biexponential Fit valves of the perovskite  $\text{CsPbBr}_3$ :x  $\text{Eu}^{3+}$  QDs glass with different  $\text{Eu}^{3+}$  ions concentrations measured using 400 nm excitan.

| sample                                            | $T_1$ (ns) | $T_2$ (ns) | $A_1$  | $A_2$     | $\tau$ (ns) |
|---------------------------------------------------|------------|------------|--------|-----------|-------------|
| 6.8% $\text{CsPbBr}_3$                            | 9.74       | 96.76      | 0.0914 | 1058      | 96.76       |
| 6.8% $\text{CsPbBr}_3$ :1.44%<br>$\text{Eu}^{3+}$ | 1.62       | 19681.93   | 0.0001 | 238845810 | 19682       |
| 6.8% $\text{CsPbBr}_3$ :3.18%<br>$\text{Eu}^{3+}$ | 37.33      | 22755.46   | 0.0016 | 13890476  | 22755       |

Fitting accurately to the sum of double-exponential.

$$\tau = \frac{\sum_i (A_i T_i^2)}{\sum_i (A_i T_i)} \quad (A_1 = \frac{T_1}{T_1 + T_2} \quad A_2 = \frac{T_2}{T_1 + T_2})$$

Table S4. Absolute PLQY of overall region for  $\text{CsPbBr}_3$ :x $\text{Eu}^{3+}$  QDs glass with different  $\text{Eu}^{3+}$  ions concentrations

| sample                                         | PLQY  |
|------------------------------------------------|-------|
| 6.8% $\text{CsPbBr}_3$                         | 35.2% |
| 6.8% $\text{CsPbBr}_3$ :1.44% $\text{Eu}^{3+}$ | 59.2% |
| 6.8% $\text{CsPbBr}_3$ :3.18% $\text{Eu}^{3+}$ | 73.5% |

Table S5 Optical parameters of the as-constructed LED with different  $\text{Eu}^{3+}$  ions concentrations

| sample                                                  | CRI  | Red<br>(%) | Green<br>(%) | Blue<br>(%) | Peak<br>(nm) | Color coordinates | excitation<br>purity | CCT(K) |
|---------------------------------------------------------|------|------------|--------------|-------------|--------------|-------------------|----------------------|--------|
| <b>6.8%CsPbBr<sub>3</sub></b>                           | 11   | 0.3        | 99.2         | 0.5         | 508.3        | (0.1534, 0.7517)  | 47.18                | 9413   |
| <b>6.8%CsPbBr<sub>3</sub>:<br/>1.44%Eu<sup>3+</sup></b> | 22.4 | 4.9        | 95           | 0.1         | 550.5        | (0.3050, 0.6302)  | 96.0                 | 5924   |
| <b>6.8%CsPbBr<sub>3</sub>:<br/>3.18%Eu<sup>3+</sup></b> | 42.8 | 41.8       | 55.7         | 2.5         | 595.2        | (0.4103, 0.4215)  | 50.48                | 2403   |
| <b>5.05%Eu<sub>2</sub>O<sub>3</sub></b>                 | 29.8 | 67.7       | 30.9         | 1.3         | 700          | (0.5298, 0.2737)  | 43.78                | 1186   |
